# Supplementary material for: Deterministic assembly processes of sediment bacterial communities regulate the effect of nitrogen input on water quality
Source: Royal Society of Chemistry journal article supplement (doi:10.1039/d5ew00727e), 2025-01-01
Supplement: d5ew00727e1.pdf [file d5ew00727e1.pdf]

**Supporting Material for:**

**Deterministic Assembly Processes of Sediment Bacterial Communities Regulate  
the Effect of Nitrogen Input on Water Quality**

Junhao Chen<sup>a,1,\*</sup>, Yanwen Ma<sup>b,1</sup>, Jiawen Yin<sup>b</sup>, Hui Qiu<sup>a</sup>, Xuanyu Tao<sup>b</sup>, Pengxiang  
Zheng<sup>a</sup>, and Ying Sun<sup>b,\*</sup>

<sup>a</sup> Power China HuaDong Engineering Corporation Limited, Hangzhou 310014, China

<sup>b</sup> Beijing Key Laboratory of Farmland Soil Pollution Prevention and Remediation,  
College of Resources and Environmental Science, China Agricultural University,  
Yuanmingyuan West Road 2<sup>#</sup>, Beijing, 100193, China

\*Corresponding author

E-mail addresses: [chen\\_jh4@hdec.com](mailto:chen_jh4@hdec.com), [sunying@cau.edu.cn](mailto:sunying@cau.edu.cn).

<sup>1</sup> Both authors contributed equally to this work.

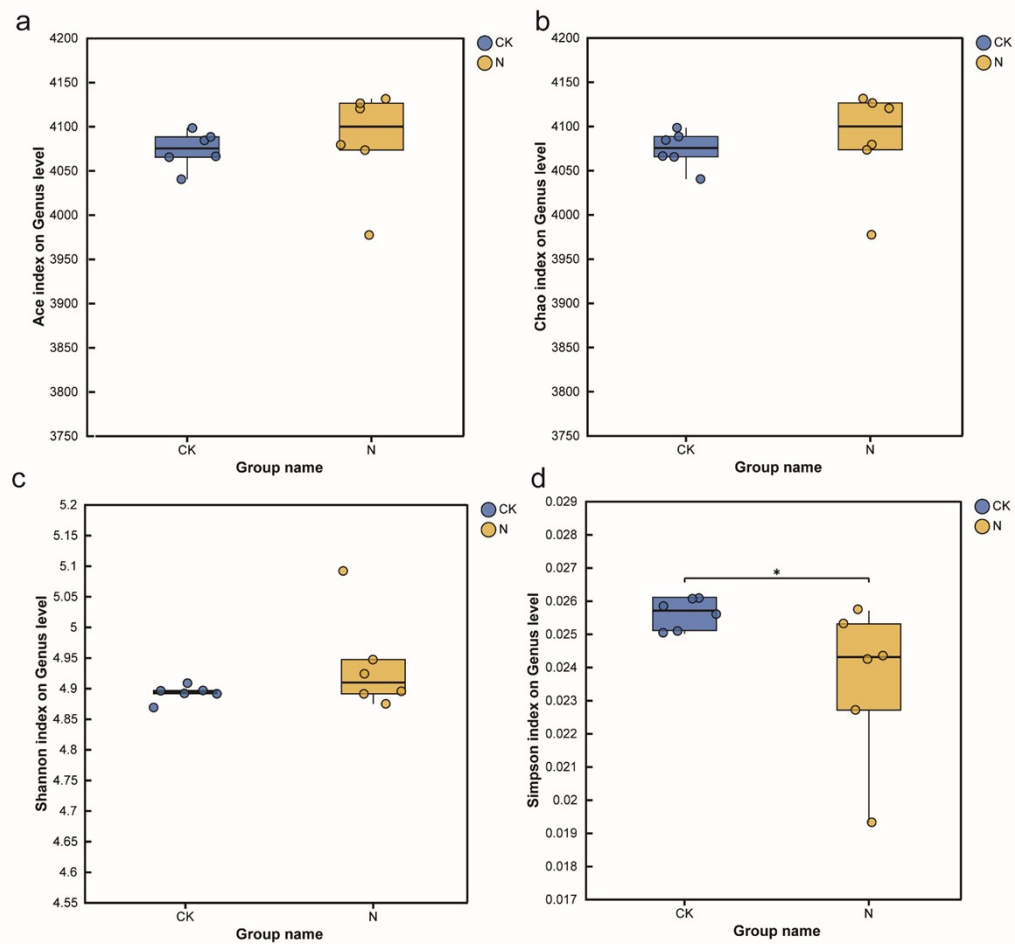

**Fig. S1** Bacterial  $\alpha$ -diversity in sediments treated with and without urea.

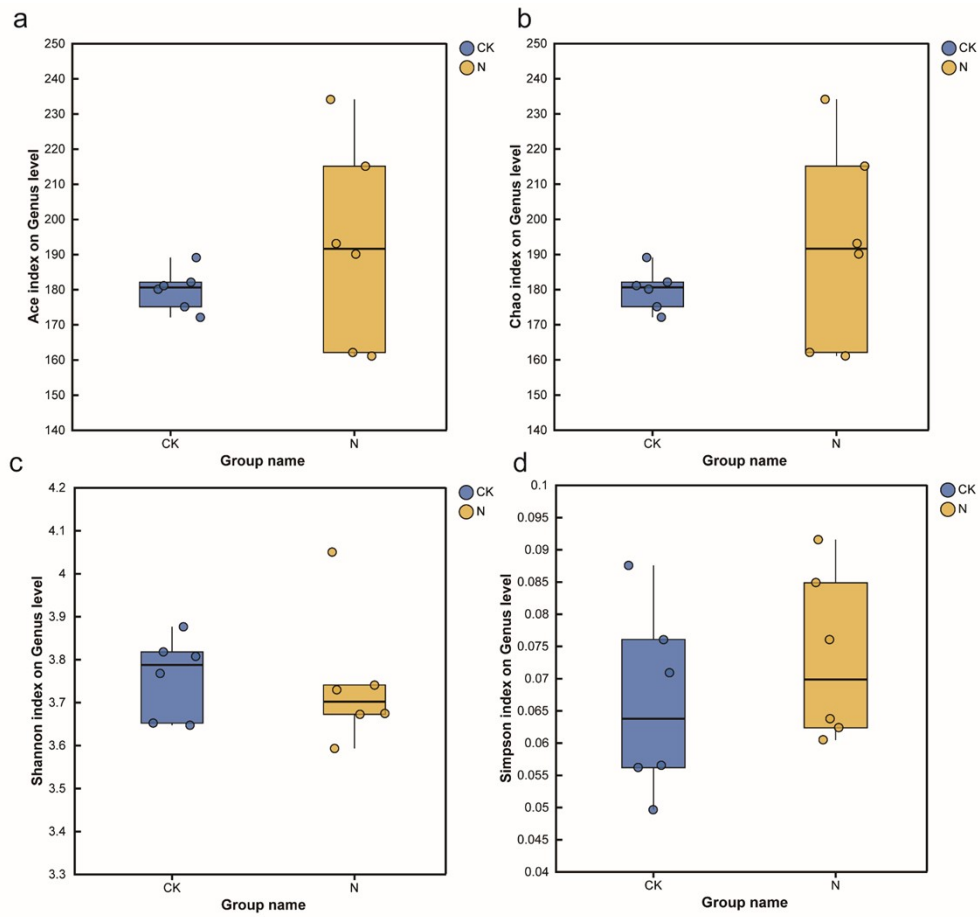

**Fig. S2** Fungal  $\alpha$ -diversity in sediments treated with and without urea.

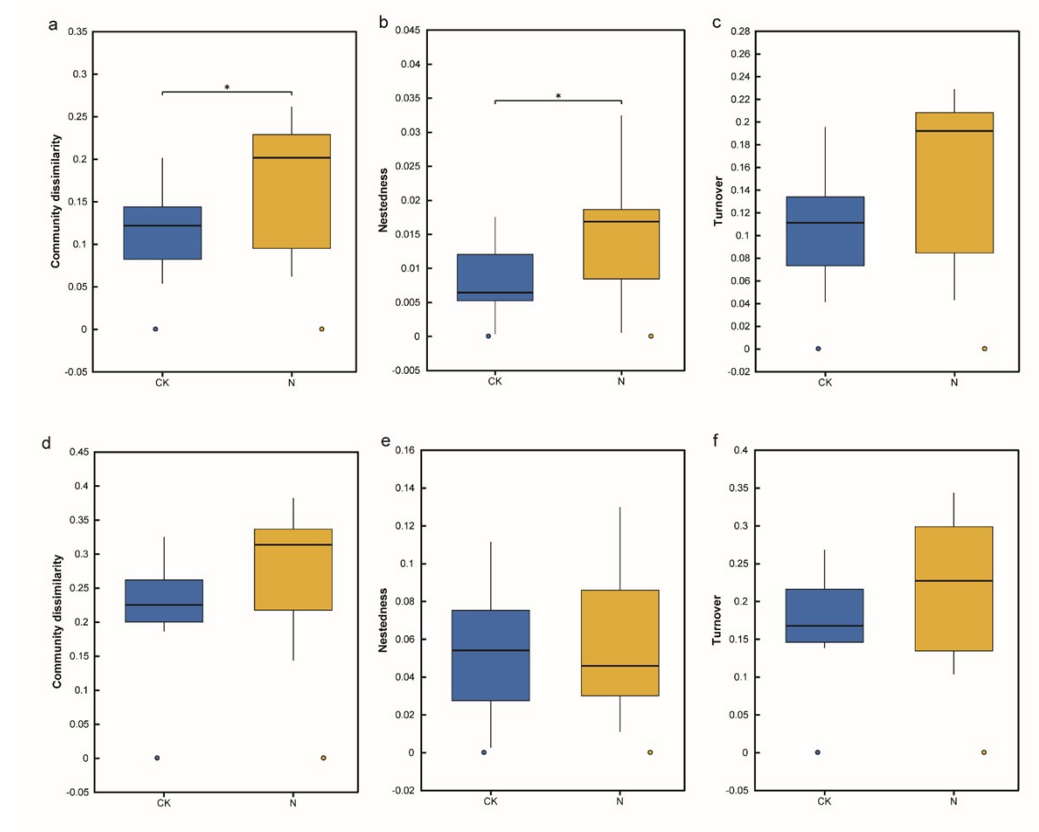

**Fig. S3** Contribution of turnover and nestedness to bacterial (a–c) and fungal (d–f)  $\beta$ -diversity.

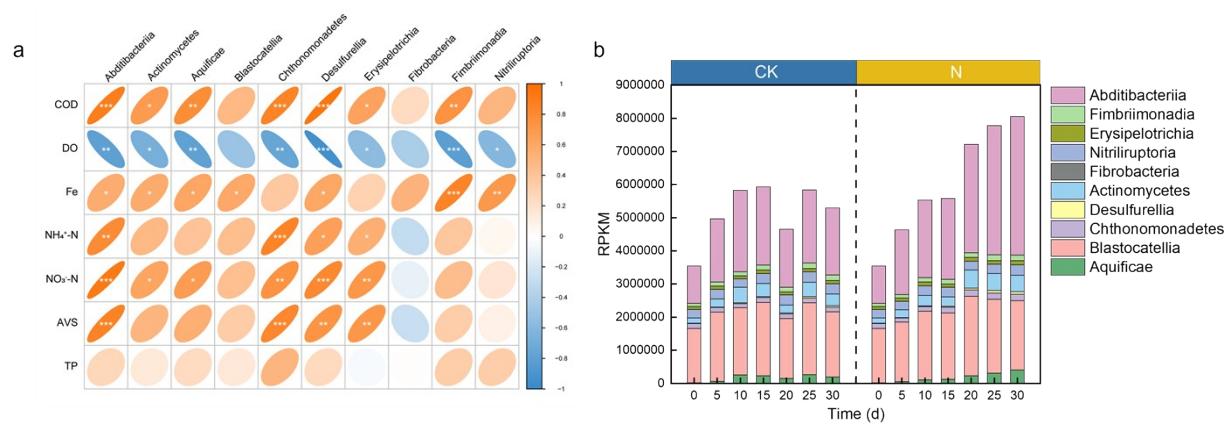

**Fig. S4** Correlation analysis between biomarkers and physicochemical properties in water and sediment.



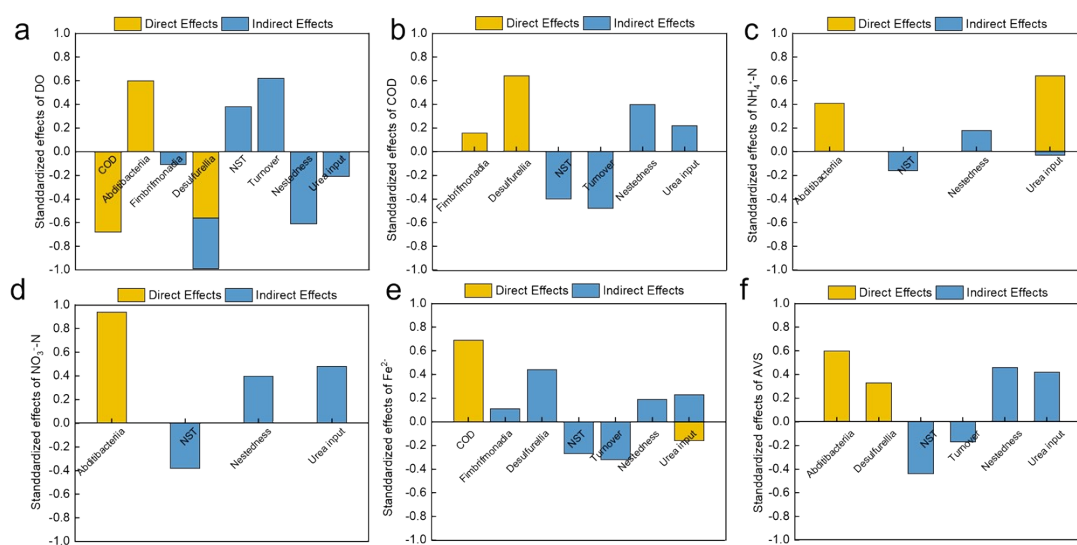

**Fig. S6** Standardized effects derived from SEM. The panel represents standardized direct and indirect effects, together describing the total effect of each variable on DO (a), COD (b),  $\text{NH}_4^+\text{-N}$  (c),  $\text{NO}_3^-\text{-N}$  (d),  $\text{Fe}^{2+}$  (e), and AVS (f) levels.
